# Supplementary material for: Ribosomal Protein Mutations Induce Autophagy through S6 Kinase Inhibition of the Insulin Pathway
Source: PubMed Central journal article supplement (PMC4038485; doi:10.1371/journal.pgen.1004371), 2014-05-29

# Supporting Figure S3

**A**

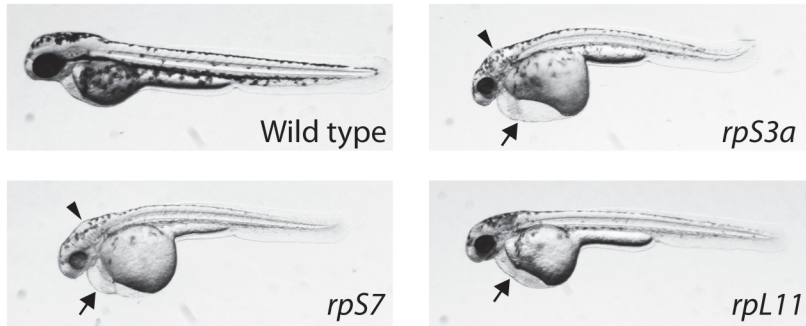

**B**

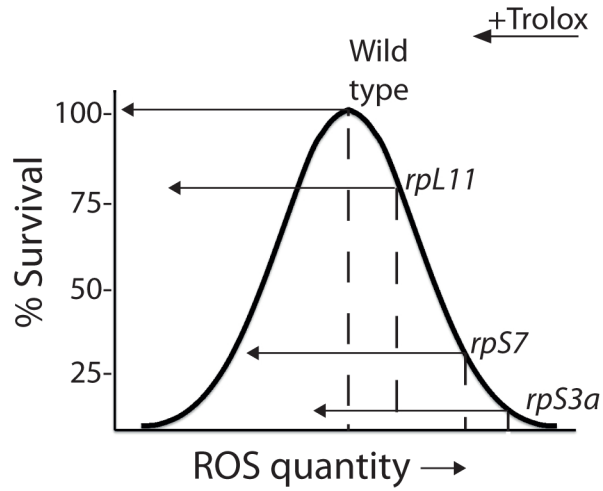

Supplement: pgen.1004371.s003.pdf [file pgen.1004371.s003.pdf]
